# Supplementary material for: Development of an objective gene expression panel as an alternative to self-reported symptom scores in human influenza challenge trials
Source: PubMed Central journal article supplement (PMC5465537; doi:10.1186/s12967-017-1235-3), 2017-06-08
Supplement: 12967_2017_1235_MOESM7_ESM.pdf [file 12967_2017_1235_MOESM7_ESM.pdf]

| <b>Gene</b> | <b>Assay ID</b> | <b>Purpose</b> |
|-------------|-----------------|----------------|
| CCL2        | Hs00234140_m1   | DSS            |
| CCL8        | Hs04187715_m1   | DSS            |
| CXCL10      | Hs01124252_g1   | DSS            |
| GAPDH       | Hs02758991_g1   | Control        |
| HERC5       | Hs00180943_m1   | DSS            |
| IFI27       | Hs00271467_m1   | DSS            |
| IFI44       | Hs00951349_m1   | DSS            |
| IFI44L      | Hs00915292_m1   | DSS            |
| IFI6        | Hs00242571_m1   | DSS            |
| IFIT1       | Hs03027069_s1   | DSS            |
| IFIT3       | Hs01922752_s1   | DSS            |
| ISG15       | Hs01921425_s1   | DSS            |
| LAMP3       | Hs00180880_m1   | DSS            |
| OAS3        | Hs00196324_m1   | DSS            |
| OASL        | Hs00984387_m1   | DSS            |
| OTOF        | Hs00191271_m1   | DSS            |
| PPIA        | Hs04194521_s1   | Control        |
| RPL30       | Hs00265497_m1   | Control        |
| RSAD2       | Hs00369813_m1   | DSS            |
| SERPING1    | Hs00163781_m1   | DSS            |
| SPATS2L     | Hs01016364_m1   | DSS            |
| USP18       | Hs00276441_m1   | DSS            |
